# Supplementary material for: Rational design of a g-C3N4/CdS/MIL-125 (Ti)-derived TiO2 ternary heterojunction as a highly efficient photocatalyst for wastewater treatment under visible-light irradiation
Source: Royal Society of Chemistry journal article supplement (doi:10.1039/d4se00403e), 2024-01-01
Supplement: d4se00403e1.pdf [file d4se00403e1.pdf]

Supporting information

**Rational design of g-C<sub>3</sub>N<sub>4</sub>/CdS/MIL-125-derived TiO<sub>2</sub> ternary heterojunction as highly efficient photocatalyst for wastewater treatment under visible-light irradiation**

Jiaqi Wang, <sup>#a</sup> Hongyang Huo, <sup>#a</sup> Guozhe Sui, <sup>\*a, b</sup> Shuang Meng, <sup>a, b</sup> Dongxuan Guo, <sup>\*a, b</sup>

Shanshan Fu, <sup>a, b</sup> Dantong Zhang, <sup>a, b</sup> Xue Yang, <sup>\*a, b</sup> Jinlong Li <sup>\*a, b</sup>

<sup>a</sup> College of Chemistry and Chemical Engineering, Qiqihar University, Qiqihar 161006, P. R. China

<sup>b</sup> Heilongjiang Provincial Key Laboratory of Catalytic Synthesis for Fine Chemicals, Qiqihar University, Qiqihar 161006, P. R. China.

Corresponding authors:

\*E-mail address: gzhui@qqhru.edu.cn (G.Z. Sui); dongxuanguo92@gmail.com (D.X. Guo); jinlong@qqhru.edu.cn (J.L. Li); Fax: +86-452-2738227; Tel: +86-452-2738227

# The author contributes equally to this paper and should be considered as co-first author.

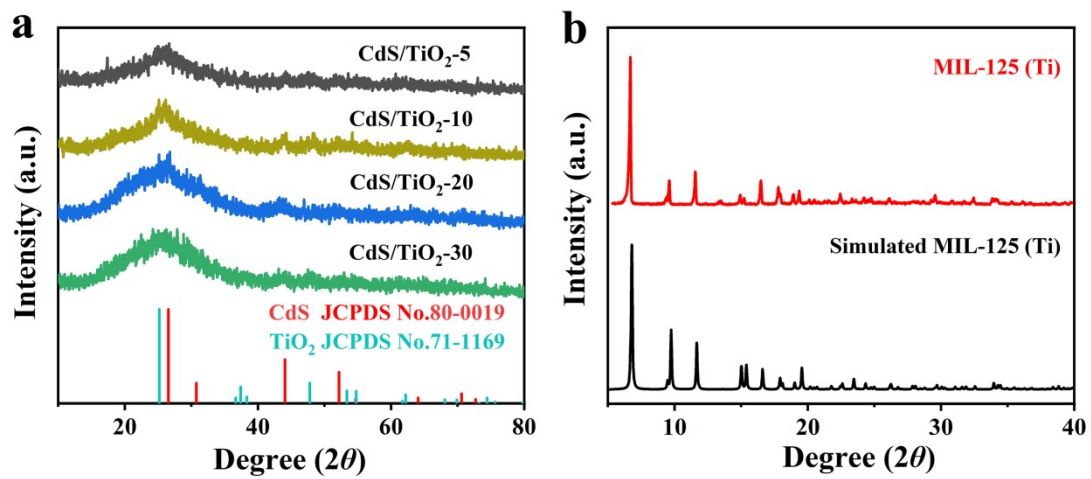

Fig. S1. XRD patterns of (a) CdS/TiO<sub>2</sub>-x and (b) MIL-125 (Ti).

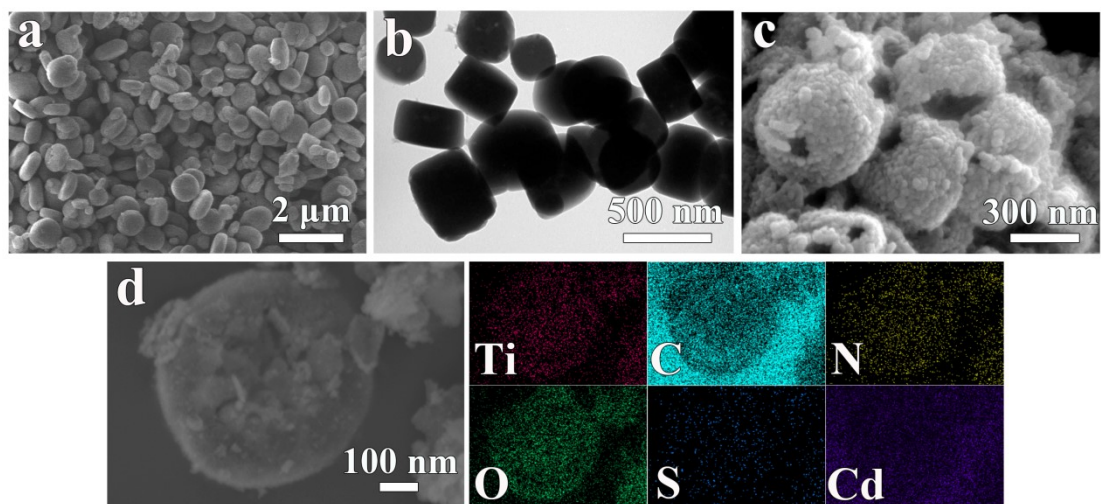

Fig. S2. (a) SEM and (b) TEM image of MIL-125 (Ti), (c) SEM image of CdS/TiO<sub>2</sub>-10, and (d) SEM-mapping images of 20-g-C<sub>3</sub>N<sub>4</sub>/CdS/TiO<sub>2</sub>-10.

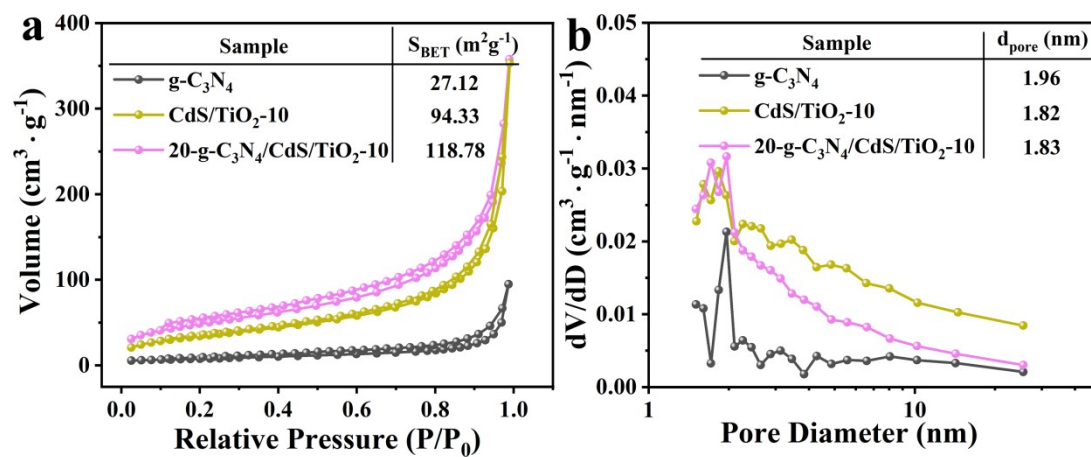

Fig. S3. (a)  $\text{N}_2$  sorption isotherms curves, and (b) the corresponding curves of pore size distribution of g- $\text{C}_3\text{N}_4$ , CdS/ $\text{TiO}_2$ -10 and 20-g- $\text{C}_3\text{N}_4$ /CdS/ $\text{TiO}_2$ -10.

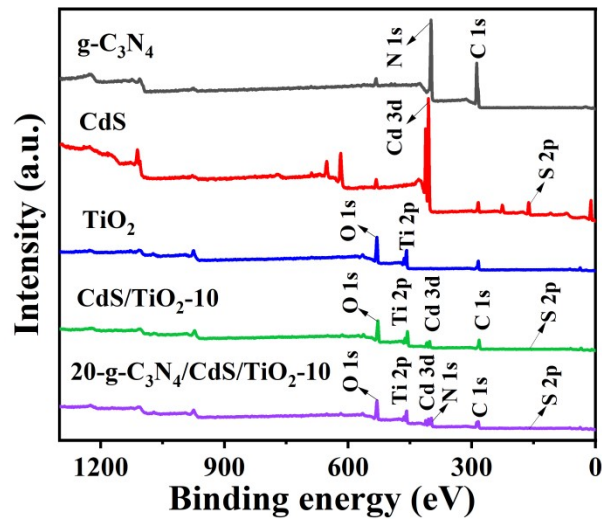

Fig. S4. XPS survey spectrum of of g-C<sub>3</sub>N<sub>4</sub>, CdS, TiO<sub>2</sub>, CdS/TiO<sub>2</sub>-10 and 20-g-C<sub>3</sub>N<sub>4</sub>/CdS/TiO<sub>2</sub>-10.

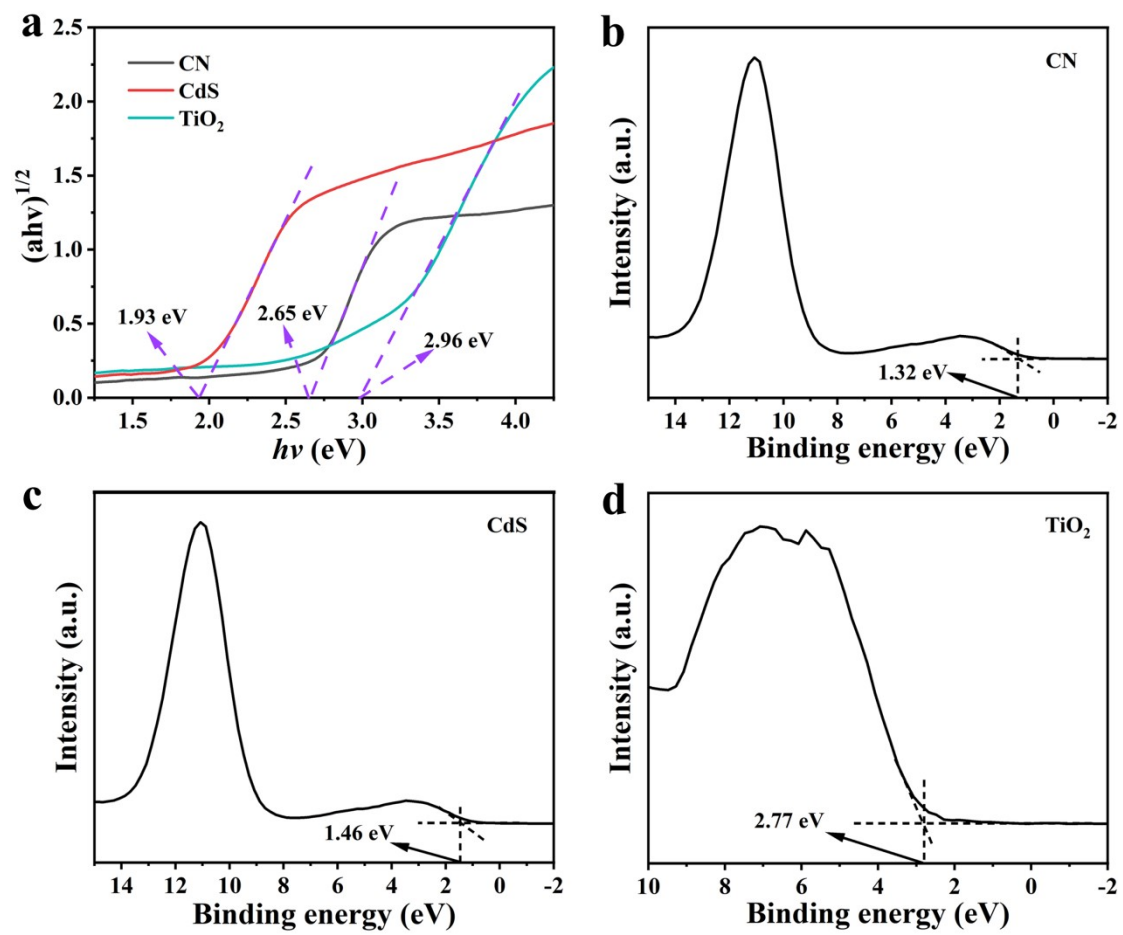

Fig. S5. (a) Kubelka-Munk plots of g-C<sub>3</sub>N<sub>4</sub>, CdS and TiO<sub>2</sub>, (b-d) VB-XPS plots of g-C<sub>3</sub>N<sub>4</sub>, CdS and TiO<sub>2</sub>.

Table S1.  $E_{CB}$  and  $E_{VB}$  of g-C<sub>3</sub>N<sub>4</sub>, CdS, and TiO<sub>2</sub>

| Samples           | g-C <sub>3</sub> N <sub>4</sub> |               | CdS           |               | TiO <sub>2</sub> |               |
|-------------------|---------------------------------|---------------|---------------|---------------|------------------|---------------|
|                   | $E_{CB}$ (eV)                   | $E_{VB}$ (eV) | $E_{CB}$ (eV) | $E_{VB}$ (eV) | $E_{CB}$ (eV)    | $E_{VB}$ (eV) |
| Mot-Schottky test | -1.29                           | 1.36          | -0.43         | 1.50          | -0.15            | 2.81          |

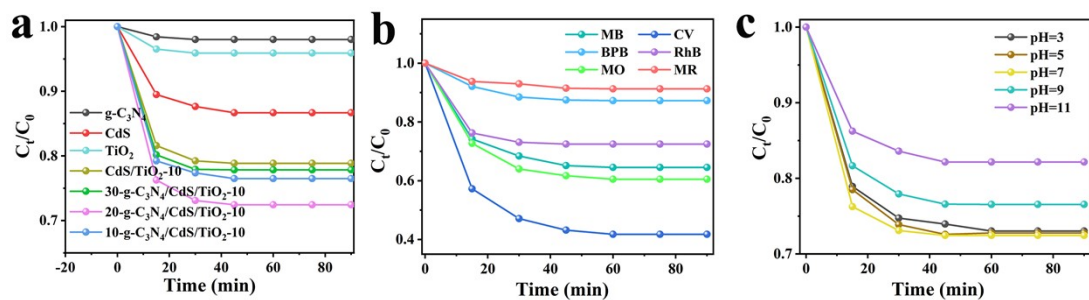

Fig. S6 (a) The adsorption curve of the synthesized photocatalyst for RhB under dark conditions; (b) The adsorption curve of other dyes; (c) The adsorption curve of dye solutions with different pH.



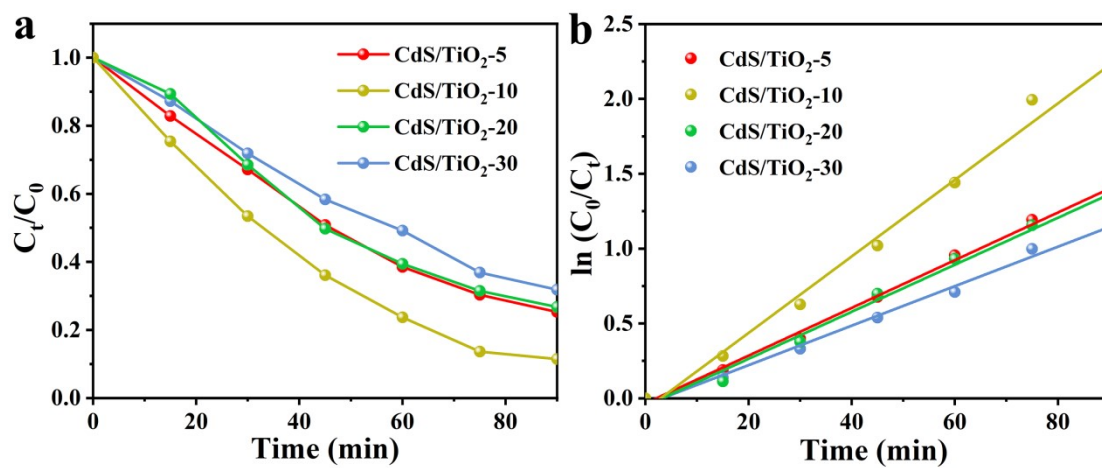

Fig. S7. (a) Photocatalytic degradation of RhB by CdS/TiO<sub>2-x</sub> and (b) the corresponding pseudo-first-order kinetic curves.

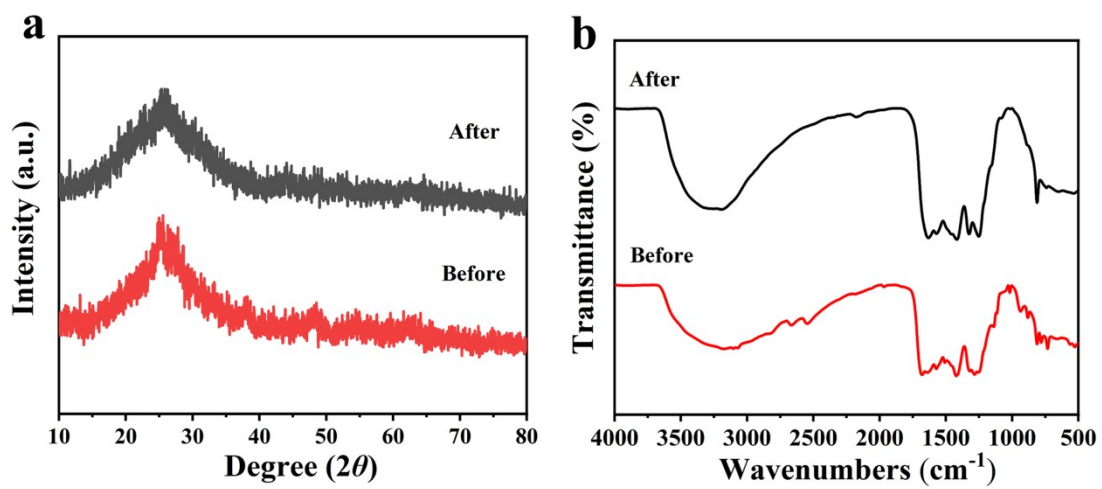

Fig. S8. (a) XRD patterns and (b) FTIR spectra of 20-g- $\text{C}_3\text{N}_4/\text{CdS}/\text{TiO}_2$ -10 before and after photocatalytic degradation reaction.

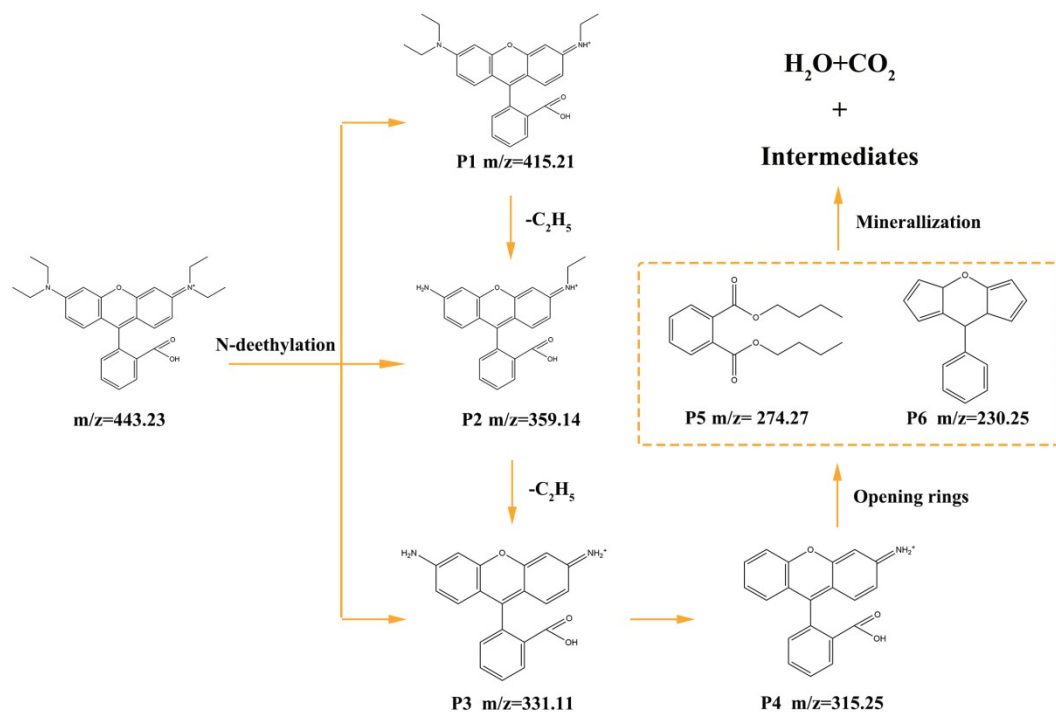

Fig. S9. The proposed pathway for photodegradation RhB by 20-g-C<sub>3</sub>N<sub>4</sub>/CdS/TiO<sub>2</sub>-10.

Table S2. The photodegradation efficiency of RhB for MOF-derived TiO<sub>2</sub> photocatalysts.

| Sample                                                                    | C <sub>catalyst</sub><br>(g·L <sup>-1</sup> ) | C <sub>pollutant</sub><br>(mg·L <sup>-1</sup> ) | Light                    | Time<br>(min) | Degradation efficiency<br>(%) | k<br>(min <sup>-1</sup> ) | Ref       |
|---------------------------------------------------------------------------|-----------------------------------------------|-------------------------------------------------|--------------------------|---------------|-------------------------------|---------------------------|-----------|
| 20-g-C <sub>3</sub> N <sub>4</sub> /CdS/TiO <sub>2</sub> -10              | 2.5                                           | 10 (RhB)                                        | 500 W Xe<br>(λ > 420 nm) | 90            | 98.9                          | 0.0494                    | This work |
| CdIn <sub>2</sub> S <sub>4</sub> @A/R-TiO <sub>2</sub>                    | 1.0                                           | 20 (MG)                                         | 1000 W Xe                | 180           | 82.1                          | 0.0492                    | [1]       |
| Ag-TiO <sub>2</sub> @carbon                                               | 2.0                                           | 15 (RhB)                                        | 500 W Hg                 | 25            | 98.8                          | 0.049                     | [2]       |
| g-C <sub>3</sub> N <sub>4</sub> /TiO <sub>2</sub>                         | 3.0                                           | 10 (MB)                                         | (λ > 420 nm)             | 150           | 97.7                          | —                         | [3]       |
| YCQDs/NH <sub>2</sub> BDC <sub>10</sub> -TiO <sub>2</sub>                 | 2.0                                           | 80 (RhB)                                        | 300 W Xe<br>(λ > 420 nm) | 120           | 87.1                          | —                         | [4]       |
| TiO <sub>2</sub> /carbon                                                  | 2.0                                           | 20 (MB)                                         | 300 W Xe<br>(λ > 420 nm) | 120           | 91.4                          | -                         | [5]       |
| N-TiO <sub>2</sub> -2                                                     | 8.0                                           | 10 (RhB)                                        | —                        | 240           | 90.0                          | 0.01014                   | [6]       |
| BiOBr/Bi <sub>24</sub> O <sub>31</sub> Br <sub>10</sub> /TiO <sub>2</sub> | 5.0                                           | 10 (RhB)                                        | 500 W Xe                 | 80            | 78.0                          | 0.04484                   | [7]       |
| 10AgC-TiO <sub>2</sub> /Cd <sub>0.5</sub> Zn <sub>0.5</sub> S             | 5.0                                           | 7 (RhB)                                         | 500 W Xe                 | 90            | 97.6                          | —                         | [8]       |

Table S3. Mass spectra of the possible intermediate products.

| No.  | Formula              | (m/z)  | Molecular structure                                                                  |
|------|----------------------|--------|--------------------------------------------------------------------------------------|
| Rh B | $C_{28}H_{31}N_2O_3$ | 443.23 | 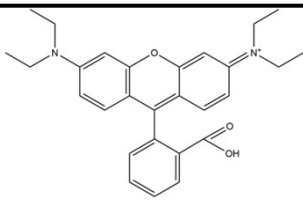   |
| P1   | $C_{26}H_{27}N_2O_3$ | 415.21 |    |
| P2   | $C_{22}H_{19}N_2O_3$ | 359.14 |    |
| P3   | $C_{20}H_{15}N_2O_3$ | 331.11 |  |
| P4   | $C_{20}H_{14}N_2O_3$ | 315.25 |  |
| P5   | $C_{16}H_{22}O_4$    | 274.27 |  |
| P6   | $C_{17}H_{12}O$      | 230.25 |  |

## References

- [1] X.H. Zhao, Y.T. Zhou, Q. Liang, M. Zhou, Z.Y. Li, S. Xu, Coupling MOF-derived titanium oxide with CdIn<sub>2</sub>S<sub>4</sub> formed 2D/3D core-shell heterojunctions with enhanced photocatalytic performance, Sep. Purif. Technol. 279 (2021) 119765. <http://doi.org/10.1016/j.seppur.2021.119765>.
- [2] X.B. Yang, J.J. Pan, J.P. Hu, S.Q. Huang, K.J. Cheng, MIL-125(Ti) derived Ag doped tablet-like TiO<sub>2</sub>@carbon composites as efficient photocatalyst for degradation of rhodamine B, J. Solid State Chem. 320 (2023) 123862. <http://doi.org/10.1016/j.jssc.2023.123862>.
- [3] J. Jia, Y.M. Wang, M.L. Xu, M.L. Qi, Y.L. Wu, G. Zhao, MOF-derived the direct Z-scheme g-C<sub>3</sub>N<sub>4</sub>/TiO<sub>2</sub> with enhanced visible photocatalytic activity, J. Sol-Gel Sci. Technol. 93 (2019) 123-130. <http://doi.org/10.1007/s10971-019-05172-3>.
- [4] J.T. Shi, C.K. Ju, T.T. Yang, J.H. Shi, K.K. Pu, T. Zhao, N. Zheng, L.J. Nie, K.K. Xue, Y.H. Gao, Carbon quantum dots modified NH<sub>2</sub>-MIL-125(Ti) acid-etching derived TiO<sub>2</sub>-based photocatalysts and efficient removal of high concentrations of dyes from wastewater under visible light, Colloids Surf. A Physicochem. Eng. Asp. 677 (2023) 132378. <http://doi.org/10.1016/j.colsurfa.2023.132378>.
- [5] S.J. Liu, Q.C. Zou, Y. Ma, D.J. Chi, R. Chen, H.X. Fang, W. Hu, K. Zhang, L.F. Chen, Metal-organic frameworks derived TiO<sub>2</sub>/carbon nitride heterojunction photocatalyst with efficient catalytic performance under visible light, Inorg. Chim. Acta, 536 (2022) 120918. <http://doi.org/10.1016/j.ica.2022.120918>.
- [6] J.L. Li, X.T. Xu, X.J. Liu, W. Qin, L.K. Pan, Novel cake-like N-doped anatase/rutile mixed phase TiO<sub>2</sub> derived from metal-organic frameworks for visible light photocatalysis, Ceram. Int. 43 (2017) 835-840. <http://doi.org/10.1016/j.ceramint.2016.10.017>.
- [7] S.R. Zhu, M.K. Wu, W.N. Zhao, F.Y. Yi, K. Tao, L. Han, Fabrication of heterostructured BiOBr/Bi<sub>24</sub>O<sub>31</sub>Br<sub>10</sub>/TiO<sub>2</sub> photocatalyst by pyrolysis of MOF composite for dye degradation, J. Solid State Chem. 255 (2017) 17-26. <http://doi.org/10.1016/j.jssc.2017.07.038>.
- [8] Y.H. Wang, C.L. Kang, X.Y. Li, Q. Hu, C. Wang, Ag NPs decorated C-TiO<sub>2</sub>/Cd<sub>0.5</sub>Zn<sub>0.5</sub>S

Z-scheme heterojunction for simultaneous RhB degradation and Cr(VI) reduction, Environ. Pollut. 286 (2021) 117305. <http://doi.org/10.1016/j.envpol.2021.117305>.
